# Supplementary material for: Using neural networks to mine text and predict metabolic traits for thousands of microbes
Source: PLoS Comput Biol. 2021 Mar 2;17(3):e1008757. doi: 10.1371/journal.pcbi.1008757 (PMC7954334; doi:10.1371/journal.pcbi.1008757)
Supplement: S2 Table — (XLSX) [file pcbi.1008757.s002.xlsx]

## Sheet: S2 Table
S2 Table. Ribosomal proteins and database IDs searched.
Ribosomal protein name	Gene symbol	KO ID
L2/L8e	L2	K02886
	L8e	K02938
L3/L3e	L3	K02906
	L3e	K02925
L4/L4e	L4	K02926
	L4e	K02930
L5/L11e	L5	K02931
	L11e	K02868
L6/L9e	L6	K02933
	L9e	K02940
L14/L23e	L14	K02874
	L23e	K02894
L15/L27Ae	L15	K02876
	L27Ae	K02900
L18/L5e	L18	K02881
	L5e	K02932
L22/L17e	L22	K02890
	L17e	K02880
L24/L26e	L24	K02895
	L26e	K02898
S3/S3e	S3	K02982
	S3e	K02985
S8/S15Ae	S8	K02994
	S15Ae	K02957
S17/S11e	S17	K02961
	S11e	K02949
S19/S15e	S19	K02965
	S15e	K02958
