# Supplementary material for: Using neural networks to mine text and predict metabolic traits for thousands of microbes
Source: PLoS Comput Biol. 2021 Mar 2;17(3):e1008757. doi: 10.1371/journal.pcbi.1008757 (PMC7954334; doi:10.1371/journal.pcbi.1008757)
Supplement: S3 Table — (XLSX) [file pcbi.1008757.s003.xlsx]

## Sheet: S3 Table
S3 Table. Parameters for calculating the phylogenetic tree in RAxML.
Parameter	Value
bootstrap_value_	100
choose_bootstop_	specify
choose_bootstrap_	b
convergence_criterion_	FALSE
datatype_	protein
disable_seqcheck_	FALSE
intermediate_treefiles_	FALSE
more_memory_	FALSE
mulcustom_aa_matrices_	FALSE
no_bfgs_	FALSE
outsuffix_	result
parsimony_seed_val_	12345
printbrlength_	TRUE
prot_matrix_spec_	DAYHOFF
prot_sub_model_	PROTGAMMA
provide_parsimony_seed_	TRUE
rearrangement_yes_	FALSE
runtime_	150
seed_value_	12345
select_analysis_	fd
